# Supplementary material for: Biodegradation Capabilities of Paraquat-Degrading Bacteria Immobilized on Nanoceramics
Source: MDPI journal article supplement (doi:10.3390/toxics11070638), 2023-07-23
Supplement: s1 [file s1]

# Supplementary Materials

## Biodegradation Capabilities of Paraquat–Degrading Bacteria Immobilized on Nanoceramics

Manee Jindakaraked <sup>1</sup>, Eakalak Khan <sup>2</sup> and Puangrat Kajitvichyanukul <sup>1,\*</sup>

<sup>1</sup> Department of Environmental Engineering, Faculty of Engineering,  
Chiang Mai University, Chiang Mai 52000, Thailand; rammy55063390@gmail.com

<sup>2</sup> Civil and Environmental Engineering and Construction Department,  
University of Nevada, Las Vegas, NV 89154-4015, USA; eakalak.khan@unlv.edu

\* Correspondence: kpuangrat@gmail.com or puangrat.k@cmu.ac.th

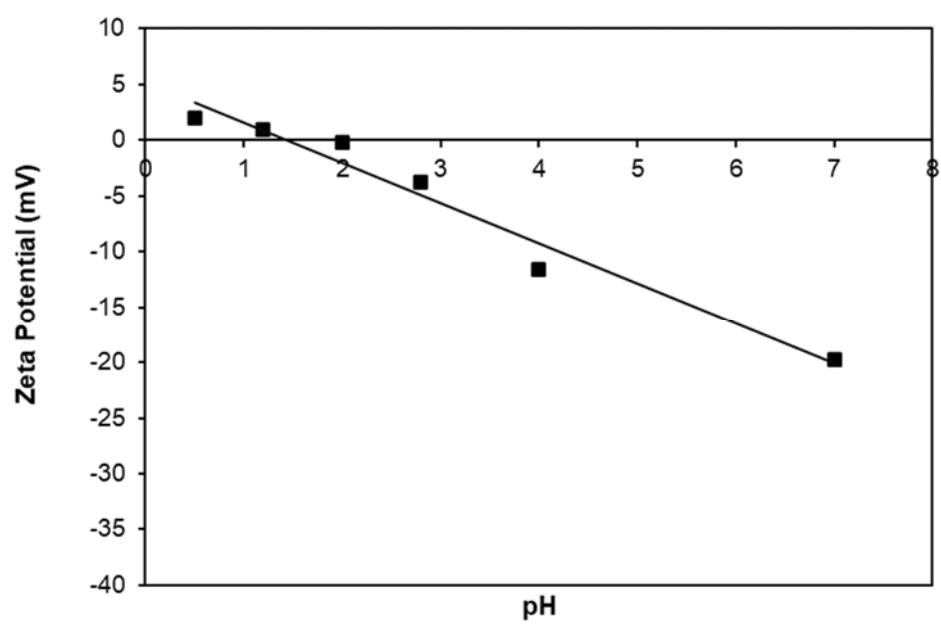

(a)

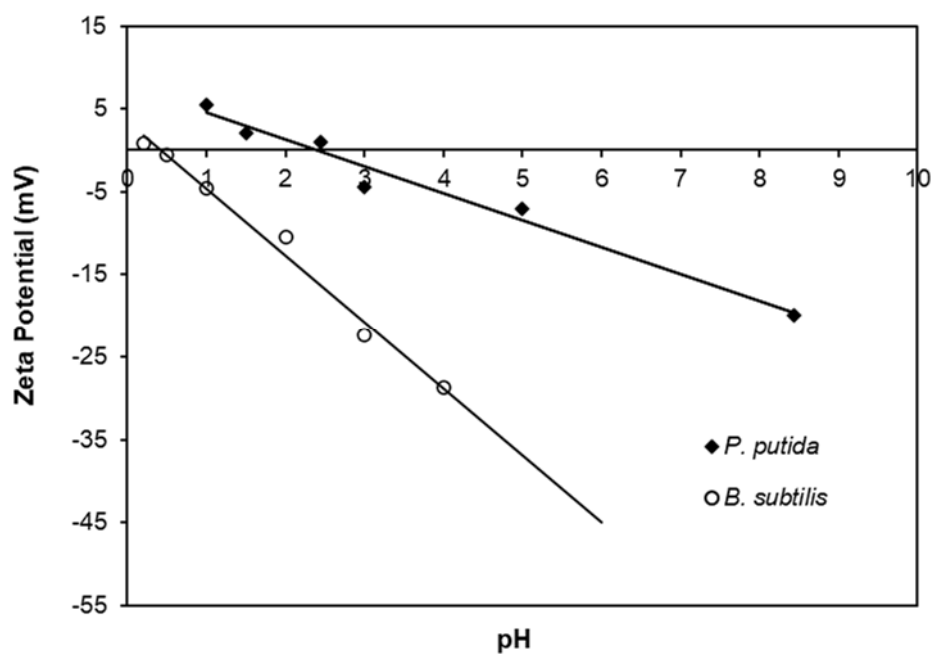

(b)

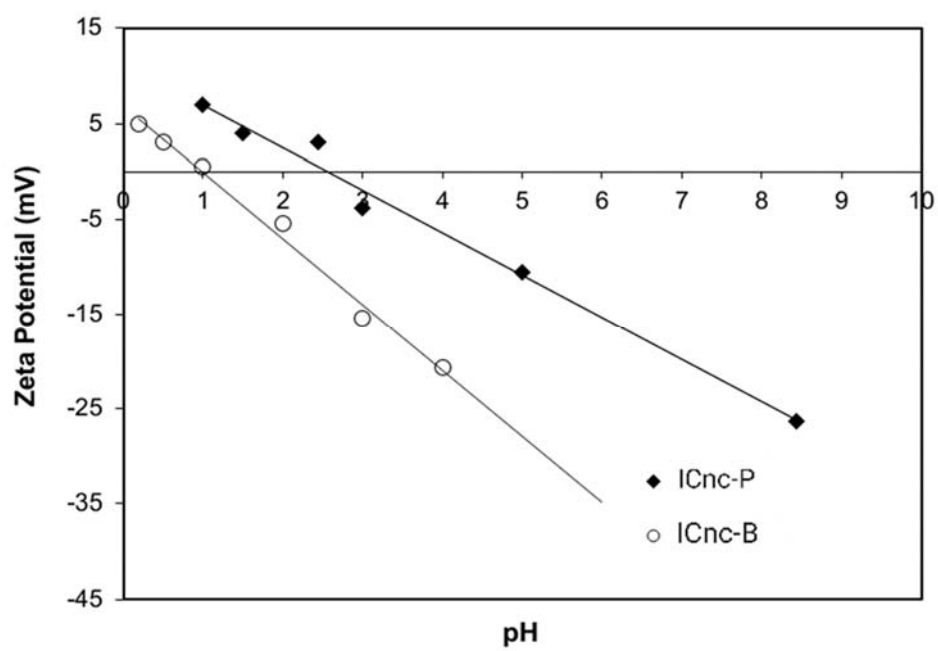

(c)

**Figure S1.** Zeta potential of (a) C<sub>nc</sub>, (b) bacteria, and (c) IC<sub>nc</sub>.
